# Supplementary material
Source: Springer Nature journal article supplement (https://www.springermedizin.de/resource/supplementary/12890_2011_276_MOESM4_ESM.pdf/9504848)

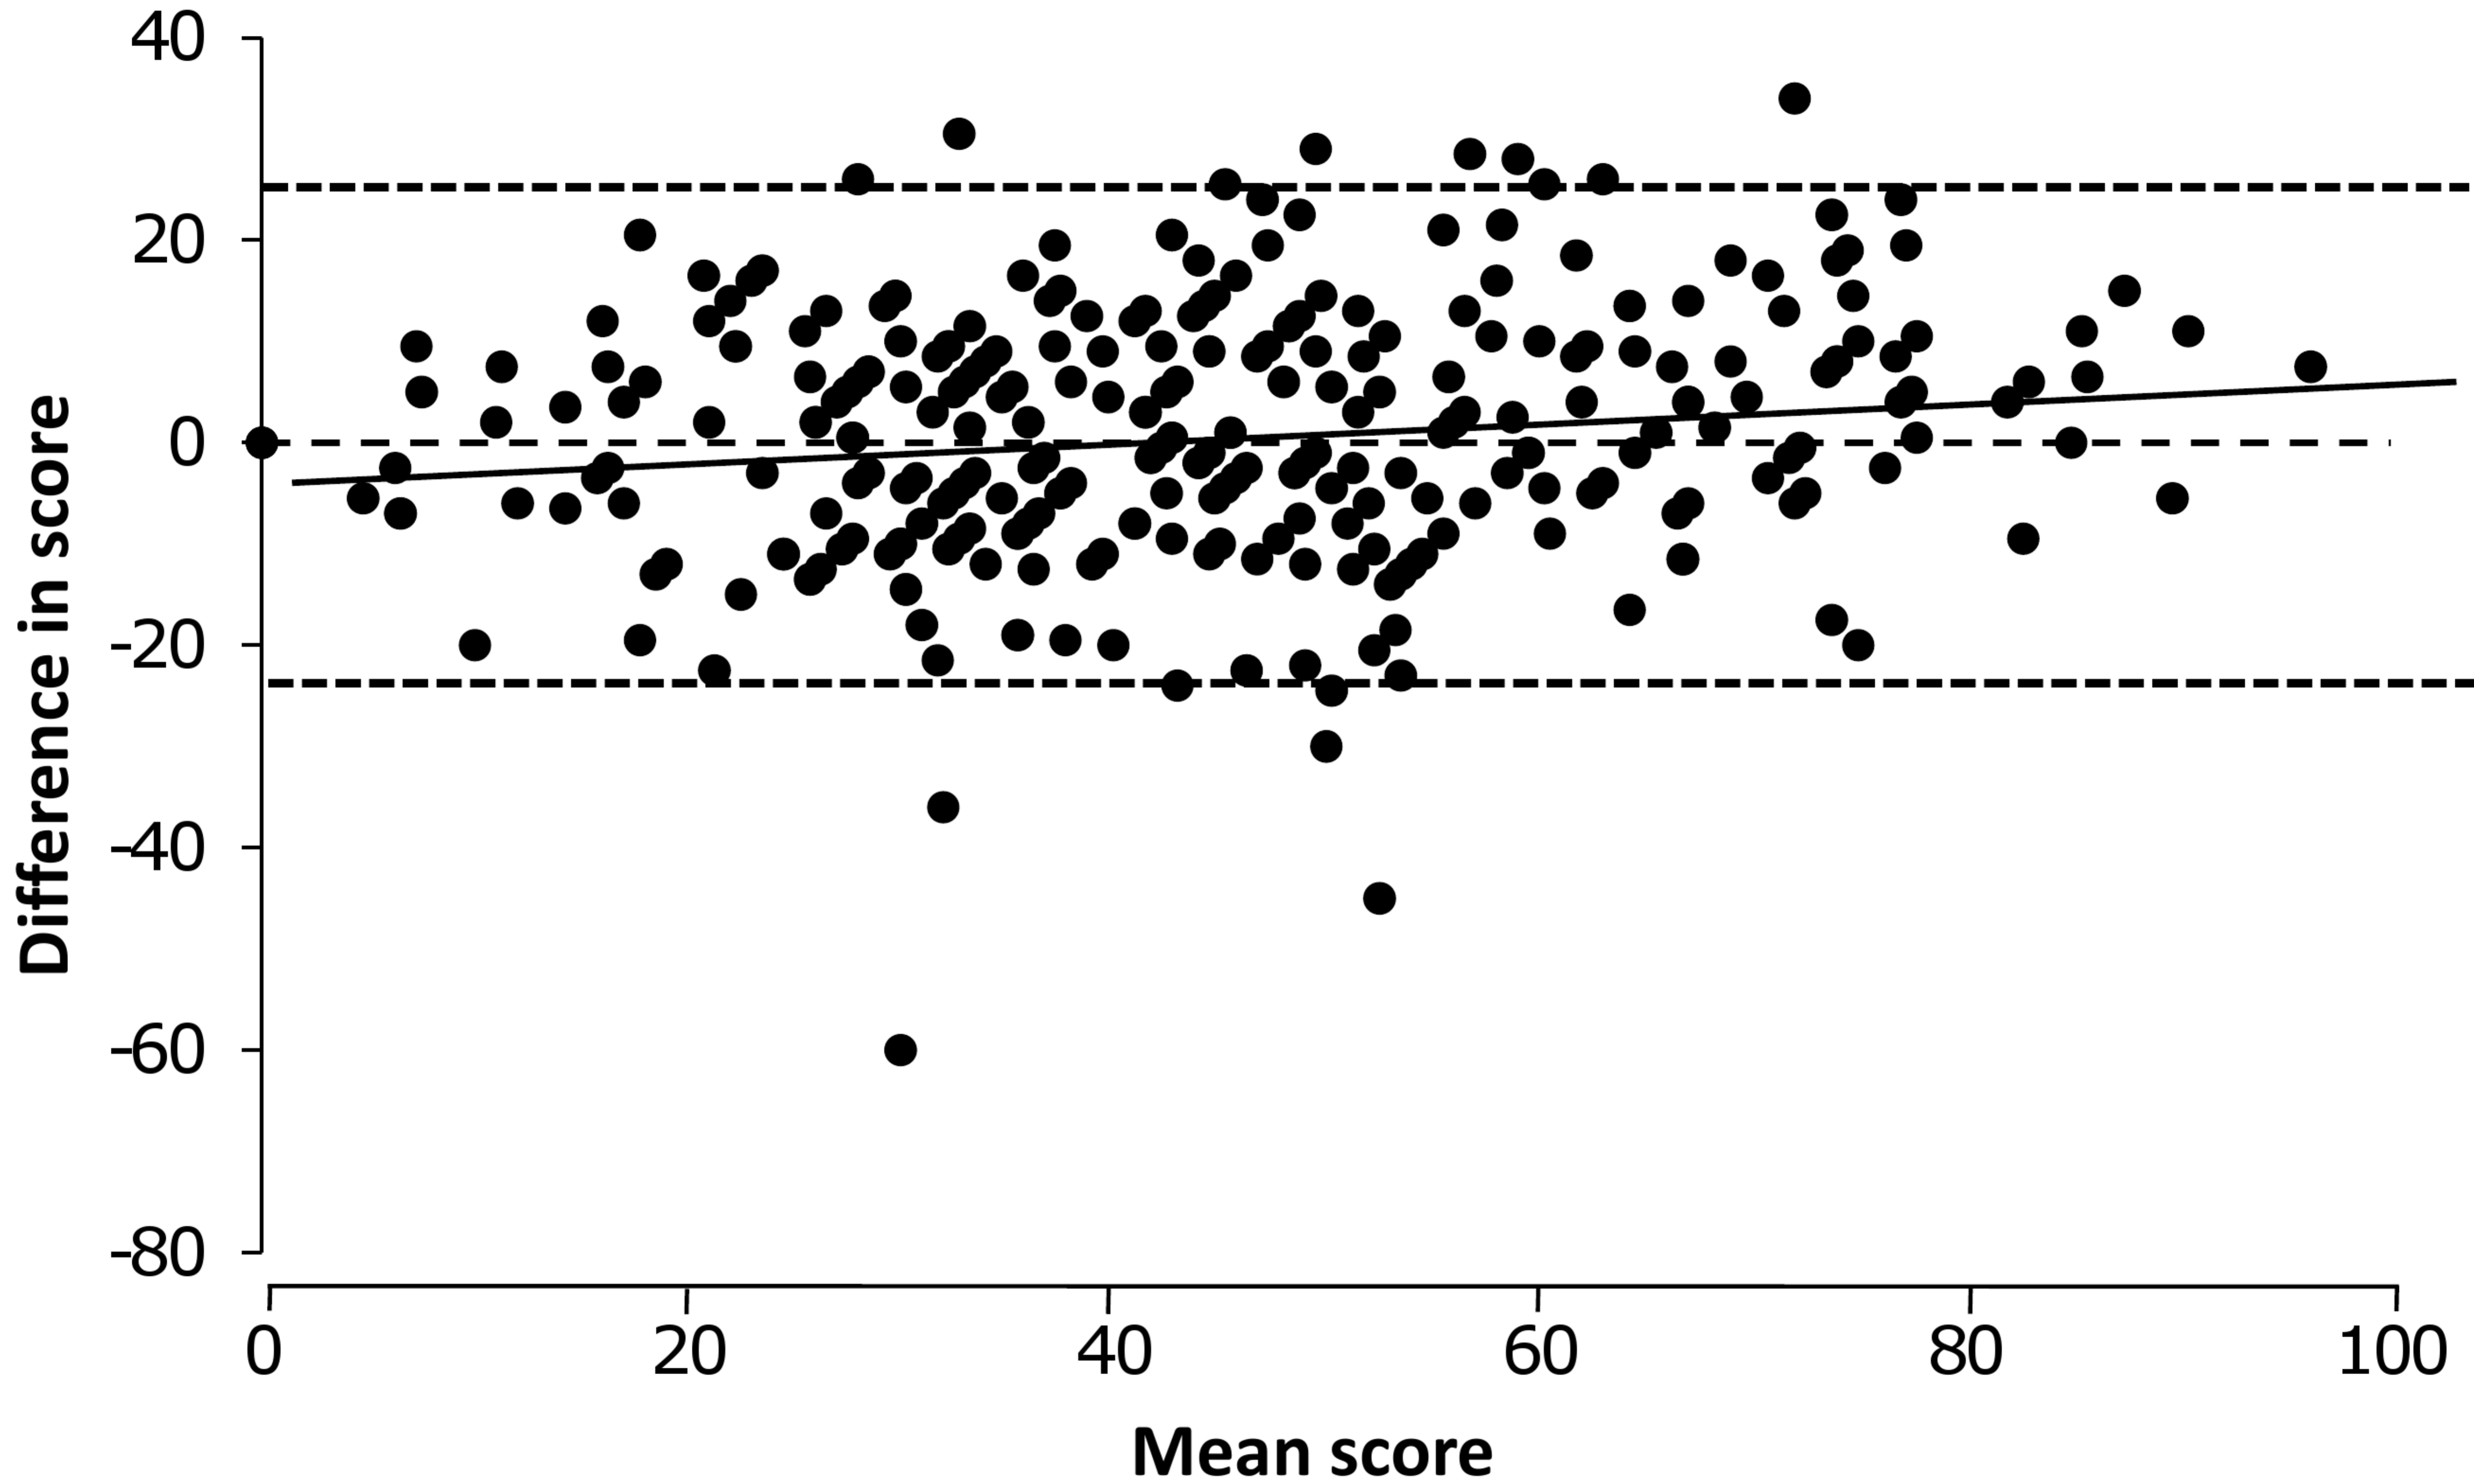

Supplement: MOESM4 [file 9504848]
